# Supplementary material for: Enhancing long-term morphological stability in BHJ organic solar cells through thermocleavable sidechains under continuous thermal stress
Source: Royal Society of Chemistry journal article supplement (doi:10.1039/d5sc06155e), 2026-01-01
Supplement: d5sc06155e1.pdf [file d5sc06155e1.pdf]

## Supporting Information

### **Enhancing Long-Term Morphological Stability in BHJ Organic Solar Cells through Thermocleavable Sidechains under Continuous Thermal Stress**

*Haoyu Zhao<sup>1</sup>, Jordan Shanahan<sup>2</sup>, Jiyeon Oh<sup>2</sup>, Saroj Upreti<sup>1</sup>, Guorong Ma<sup>1</sup>, Wei You<sup>2\*</sup>,  
and Xiaodan Gu<sup>1\*</sup>*

1. School of Polymer Science and Engineering, Center for Optoelectronic  
Materials and Devices, The University of Southern Mississippi, Hattiesburg,  
MS 39406, USA  
E-mail: [xiaodan.gu@usm.edu](mailto:xiaodan.gu@usm.edu)
2. Department of Chemistry, University of North Carolina at Chapel Hill, Chapel  
Hill, NC 27599, USA  
E-mail: [wyou@unc.edu](mailto:wyou@unc.edu)

List of supporting figures

Figure S1 to S13

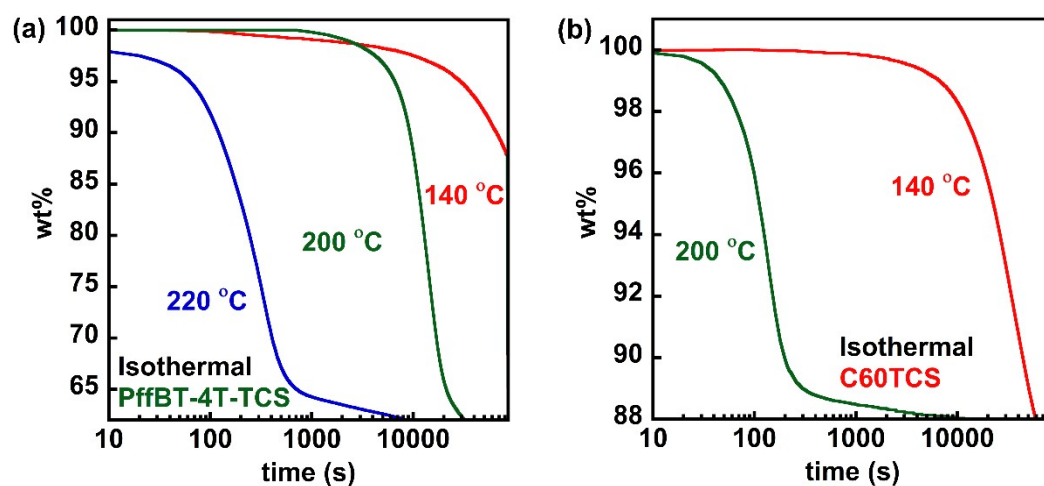

**Figure S1.** Isothermal TGA of thermal cleavable materials: (a) PffBT-4T-TCS and (b) C60TCS at different annealing temperature of 140 °C, 200 °C, and 220 °C.

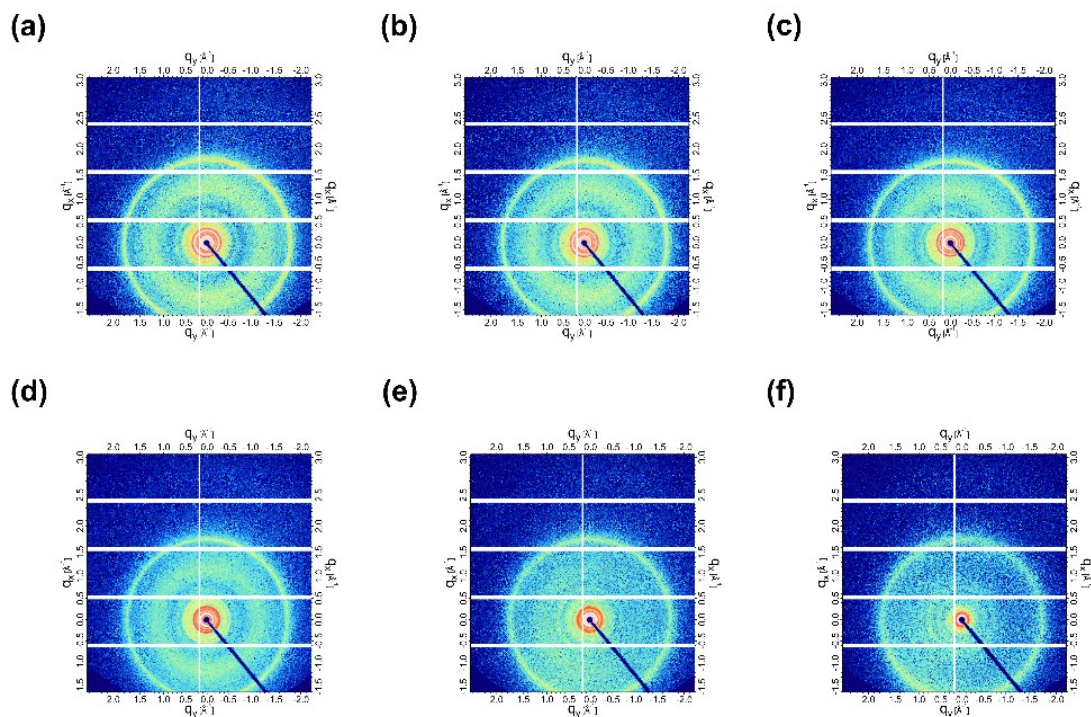

**Figure S2.** *in situ* heating WAXS 2D scattering images for PffBT-4T-TCS at various temperatures. (a) 25 °C; (b) 100 °C; (c) 150 °C; (d) 200 °C; (e) 250 °C; (f) 300 °C.

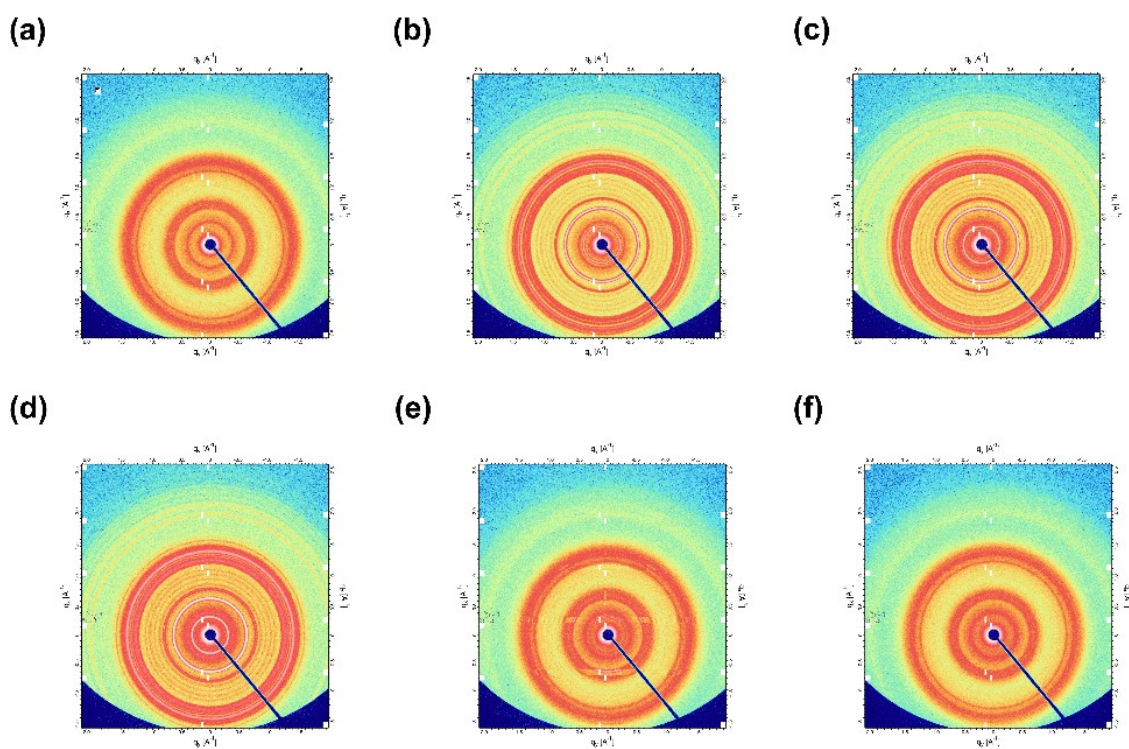

**Figure S3.** *in situ* heating WAXS 2D scattering images for C60TCS at various temperatures. (a) 25 °C; (b) 50 °C; (c) 100 °C; (d) 150 °C; (e) 200 °C; (f) 225 °C.

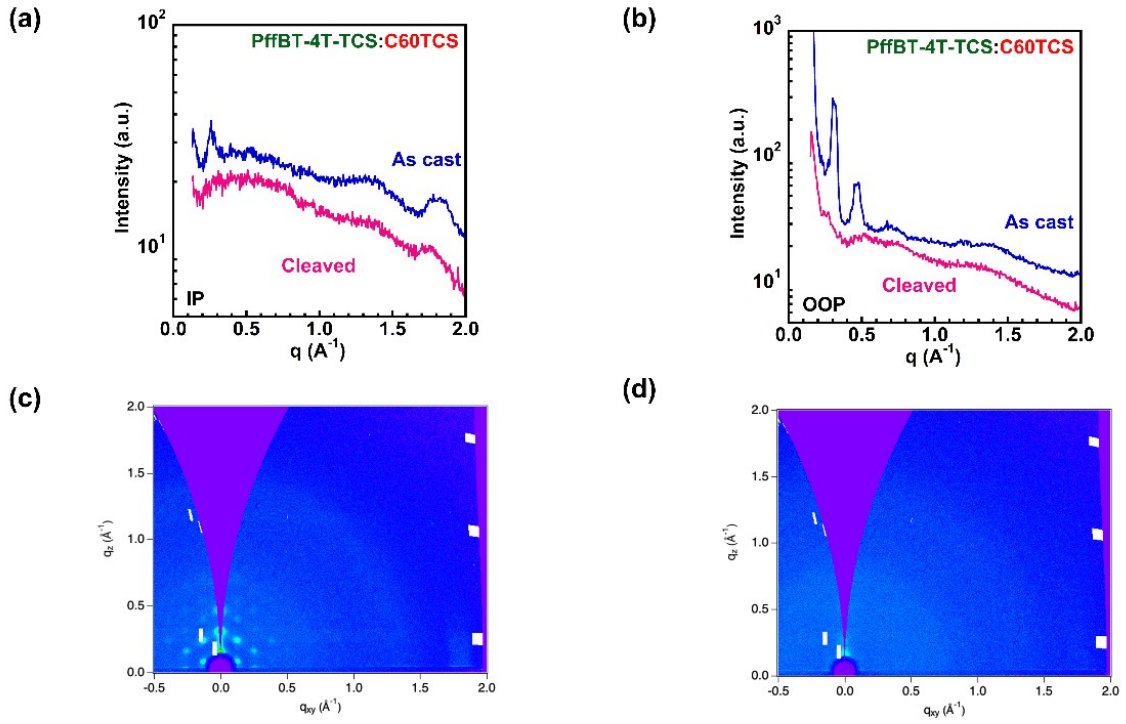

**Figure S4.** *ex situ* GIWAXS characterization of the PffBT-4T-TCS: C60TCS (1:1.2 wt%) blend film before and after thermal cleavage. (a) 1D in-plane scattering profiles for as cast and cleaved blend; (b) 1D out-of-plane scattering profiles for as-cast and cleaved blend; (c) 2D GIWAXS pattern for the as cast blend; (d) 2D GIWAXS pattern for cleaved blend. A notable decrease in the alkyl chain packing peak at  $q = 0.3 \text{ \AA}^{-1}$  was observed after thermal annealing at  $220 \text{ }^\circ\text{C}$  for 30 minutes, indicating the successful removal of alkyl side chains.

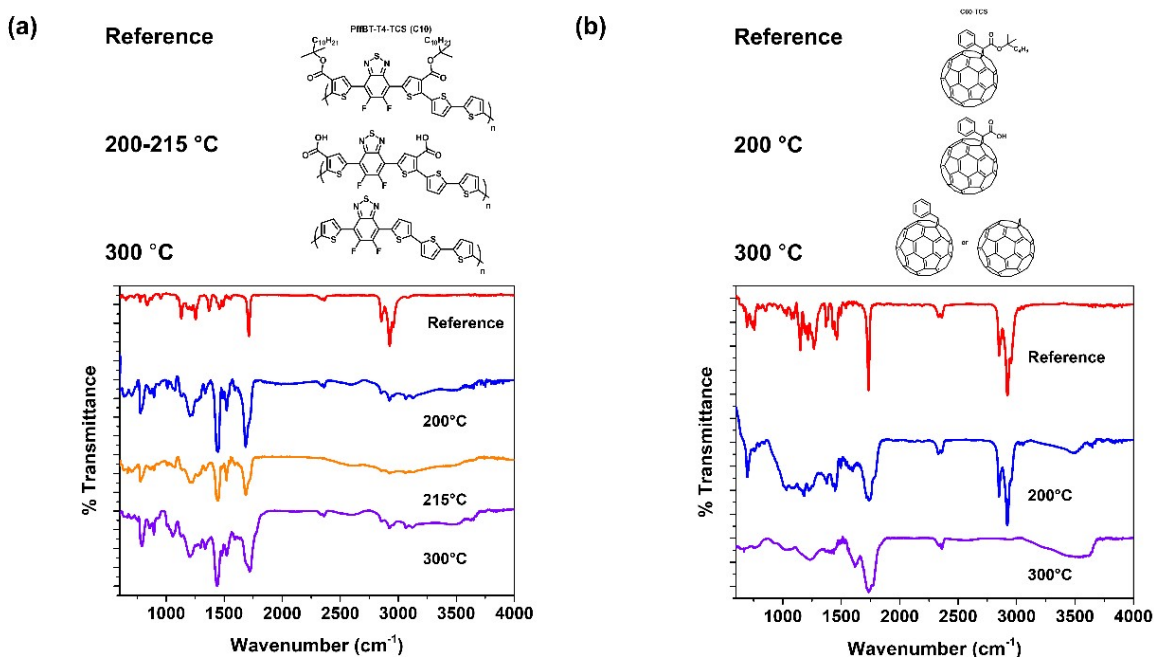

**Figure S5.** Bulk FTIR spectra showing the absorption peaks of the thermocleavable donor and acceptor before and after thermal cleavage. (a) PffBT-4T-TCS and (b) C60TCS.

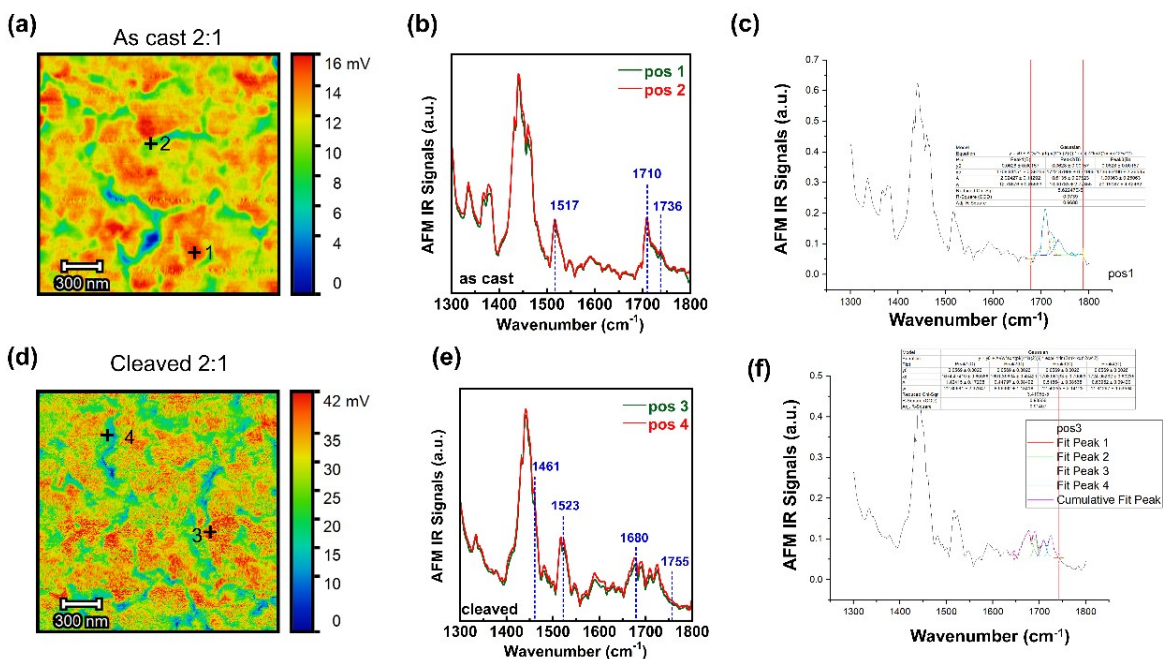

**Figure S6.** IR spectral analysis of thermocleavable donor/acceptor blend at a 2:1 ratio. (a) AFM-IR image of the as-cast film; (b) IR spectra of as-cast film; (c) peak fitting for as cast film to obtain signal ratio of donor and acceptor; (d) AFM-IR of the cleaved film; (e) IR spectra of the cleaved film; (f) fitting peak for cleaved film to obtain signal ratio between donor and acceptor.



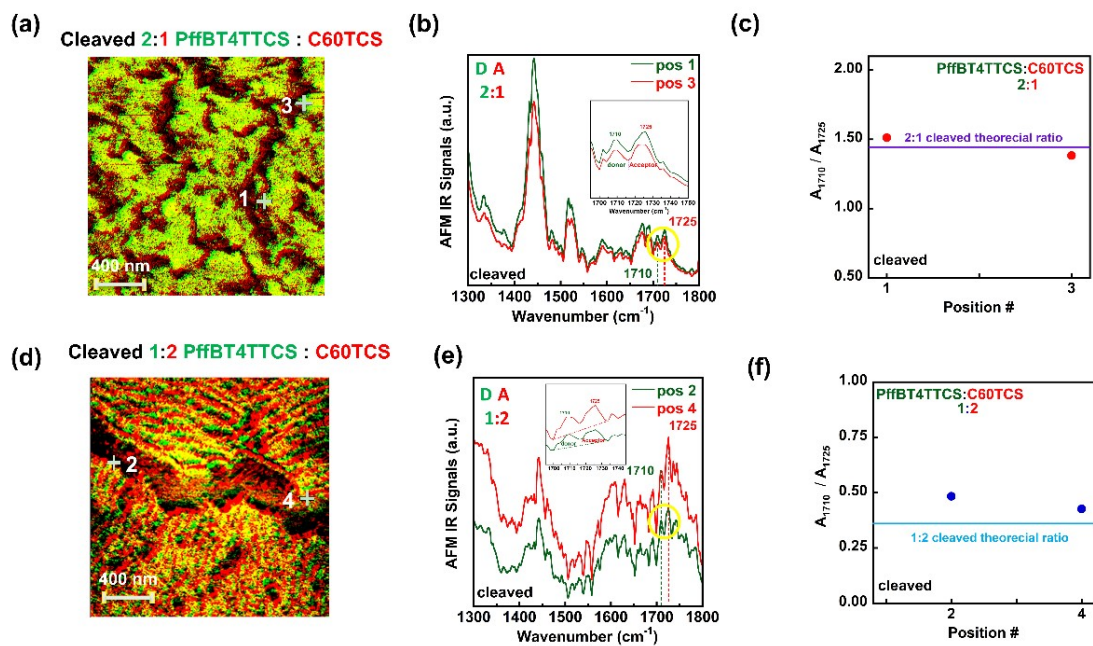

**Figure S7.** Calibration curve development using thermocleavable donor/acceptor blend at varying concentrations. (a) AFM-IR image of cleaved 2:1 blend; (b) IR spectra analysis of cleaved 2:1 blend; (c) peak ratio analysis at different positions for 2:1 blend; (d) AFM-IR image of cleaved 1:2 blend; (e) IR spectra analysis of cleaved 1:2 blend; (f) peak ratio analysis at different positions for 1:2 blend.

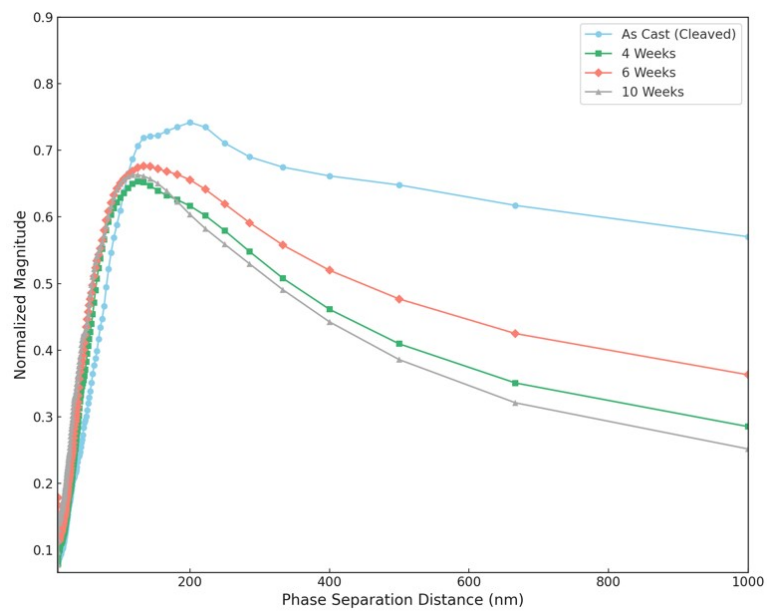

**Figure S8.** 2D Fourier transform analysis of thermally annealed samples with different time as listed in figure 4. The Y axis represents the distribution histogram of domain spacing in the phase -separated sample.

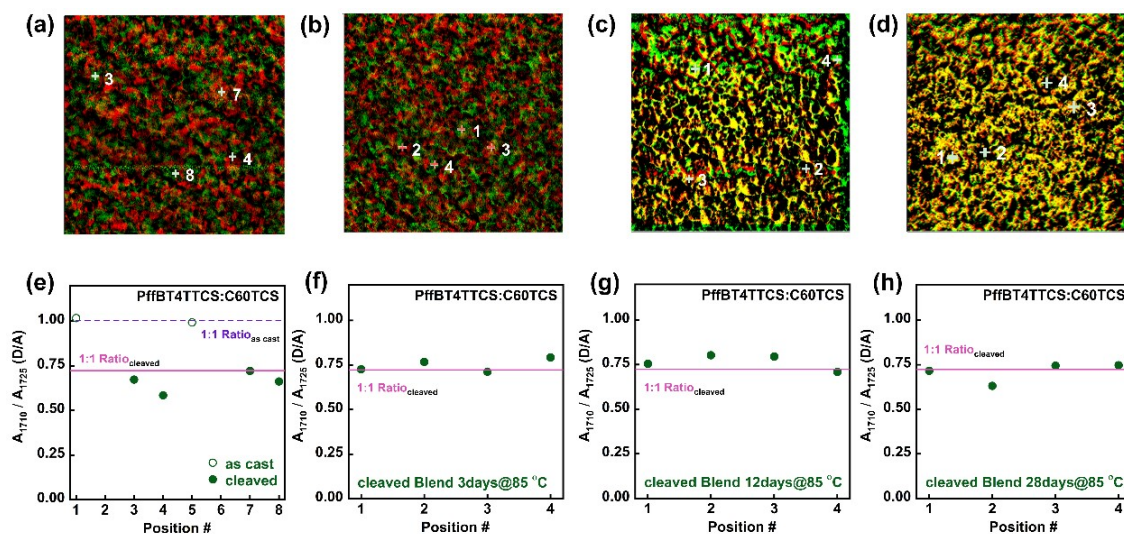

**Figure S9.** Morphological stability assessment of the cleaved donor:acceptor blend. (a) Overlay image of freshly cleaved blends; (b) overlay image after annealing at 85 °C for 3 days; (c) after 12 days; (d) after 28 days; (e-h) corresponding local chemical compositions for each condition, where dashed line indicates the theoretical donor:acceptor 1:1 ratio during sample formulation.



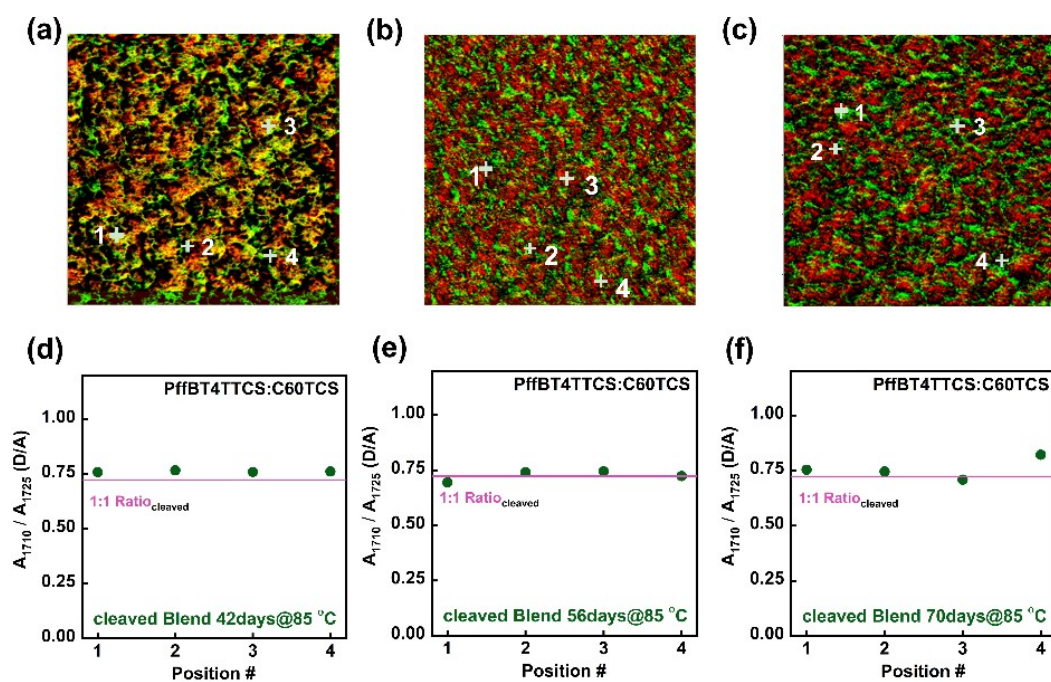

**Figure S10.** Long-term morphological stability test of cleaved donor:acceptor blend. (a) Overlay image after annealing at 85 °C for 42 days; (b) for 56 days ; (c) for 70 days; (d-f) corresponding local chemical compositions for each condition, where dashed line indicates the theoretical donor:acceptor 1:1 ratio during sample formulation.

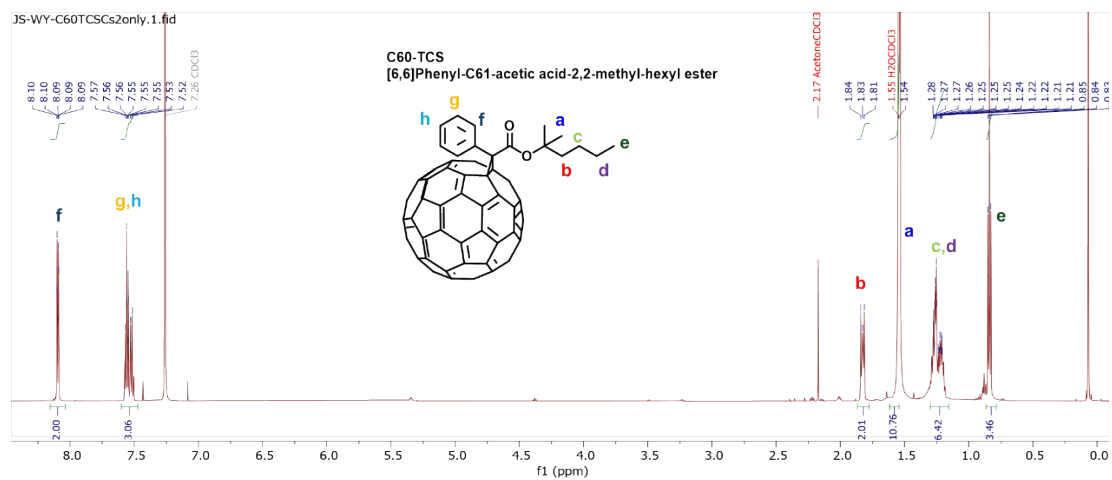

**Figure S11.**  $^1\text{H}$ -NMR spectra of C60-TCS in  $\text{CDCl}_3$

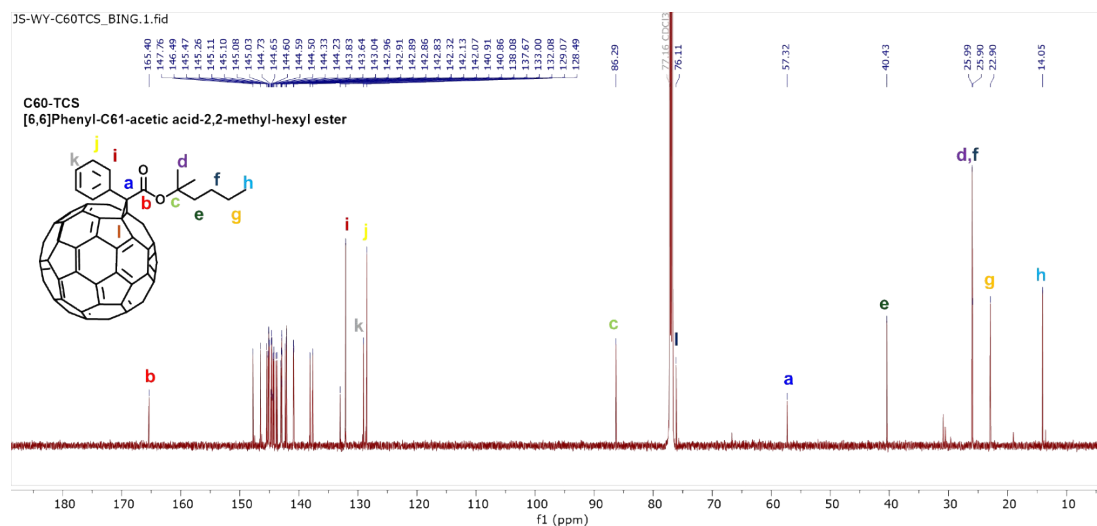

**Figure S12.**  $^{13}\text{C}$ -NMR spectra of C60-TCS in  $\text{CDCl}_3$

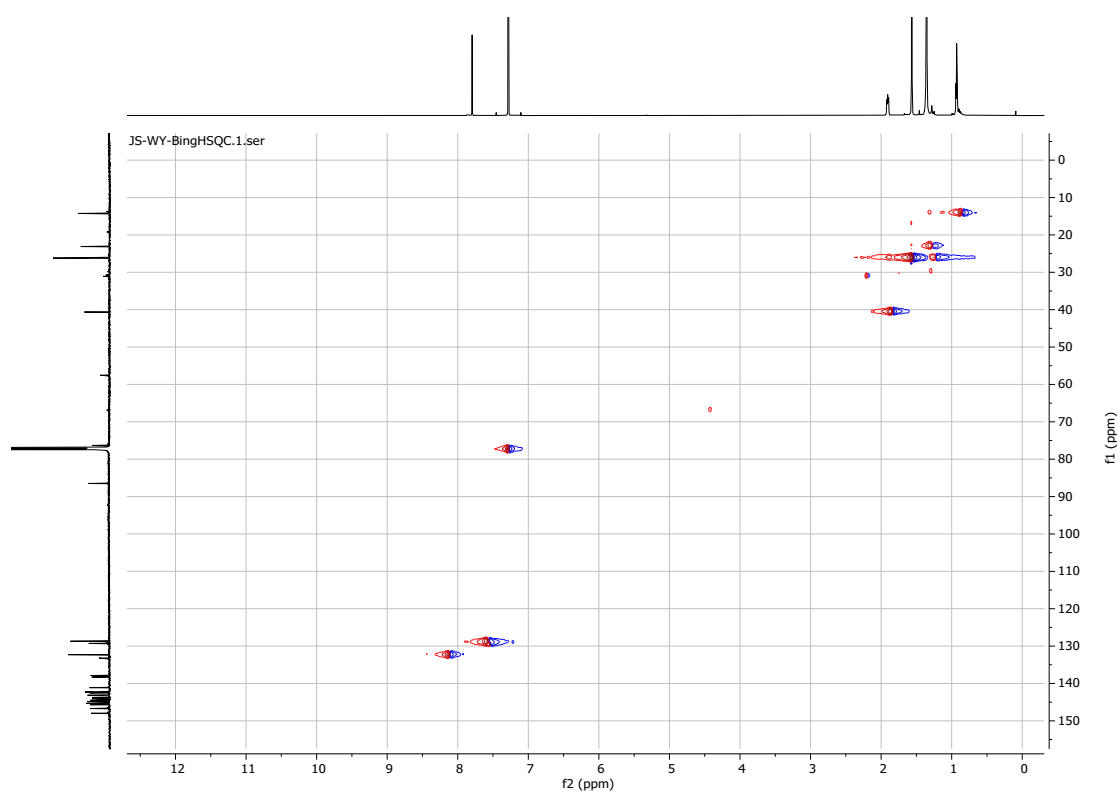

**Figure S13.** HSQC 2D NMR of C60-TCS in  $\text{CDCl}_3$
